# Supplementary material
Source: publisher site journal article supplement (https://www.dovepress.com/article/288052)
Supplement: Supplementary file 1 [file get_supplementary_file.php]

**Supplemental Figure**

**
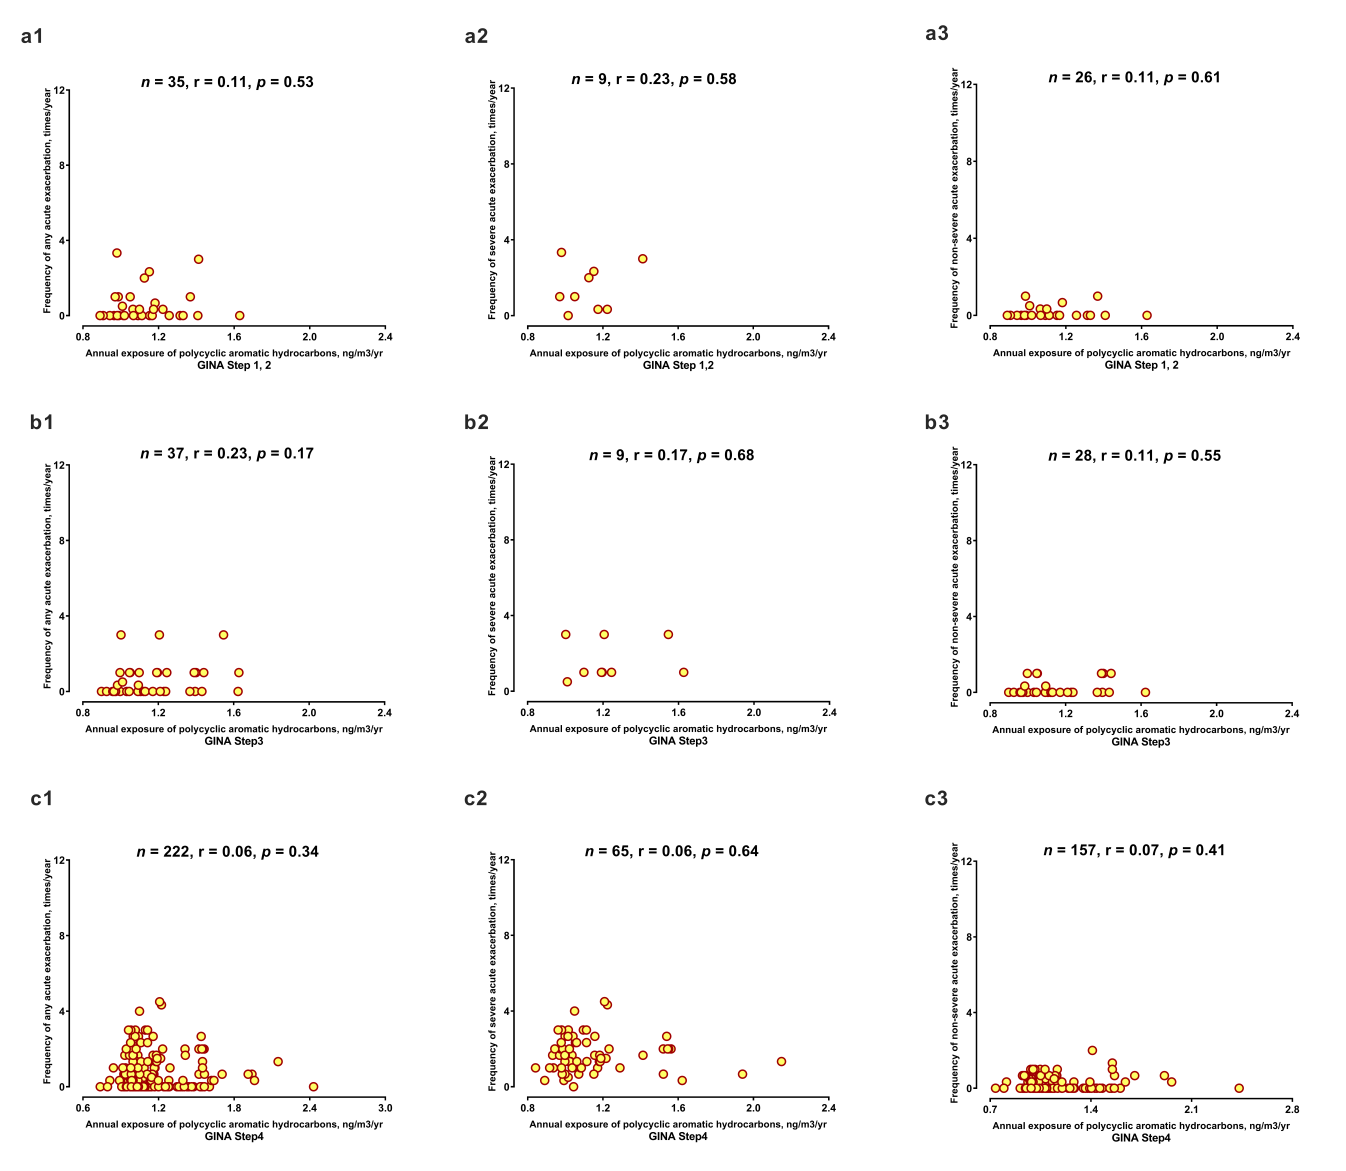
**

**Supplemental Figure 1** Scatterplot of the annual exposure concentration of polycyclic aromatic hydrocarbons (ng/m3/year) against the annual frequency of any acute exacerbation (**a1**), the annual frequency of severe acute exacerbation (**a2**) and the annual frequency of non-severe acute exacerbation (time/year) (**a3**) in asthmatic patients who were in GINA 1 and 2 subgroups. Scatterplot of the annual exposure concentration of polycyclic aromatic hydrocarbons (ng/m3/year) against the annual frequency of any acute exacerbation (**b1**), the annual frequency of severe acute exacerbation (**b2**) and the annual frequency of non-severe acute exacerbation (time/year) (**b3**) in asthmatic patients who were in GINA 3 subgroup. Scatterplot of the annual exposure concentration of polycyclic aromatic hydrocarbons (ng/m3/year) against the annual frequency of any acute exacerbation (c1), the annual frequency of severe acute exacerbation (**c2**) and the annual frequency of non-severe acute exacerbation (time/year) (**c3**) in asthmatic patients who were in GINA 4 subgroup. *P* value is indicated.
